# Supplementary material
Source: PubMed Central journal article supplement (PMC4321967)

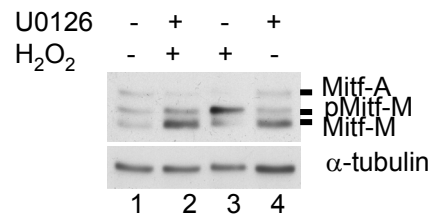

Liu et al., Fig S1

Supplement: NIHMS648098-supplement-Supplementary_Figure_S1.pdf [file NIHMS648098-supplement-Supplementary_Figure_S1.pdf]
